# Supplementary material for: A QSAR Study for Antileishmanial 2-Phenyl-2,3-dihydrobenzofurans
Source: MDPI journal article supplement (doi:10.3390/molecules28083399), 2023-04-12
Supplement: s1 [file s1]

# A QSAR Study for Antileishmanial 2-Phenyl-2,3-dihydrobenzofurans <sup>†</sup>

Freddy A. Bernal <sup>‡</sup> and Thomas J. Schmidt <sup>\*</sup>

University of Münster, Institute of Pharmaceutical Biology and Phytochemistry (IPBP),  
PharmaCampus—Corrensstraße 48, 48149 Münster, Germany; freddy.bernal@leibniz-hki.de

<sup>\*</sup> Correspondence: thomschm@uni-muenster.de

<sup>†</sup> This work is cordially dedicated to the memory of Prof. A. Wilhelm Alfermann,  
Düsseldorf, deceased on 23 February 2023, who spent a great part of his scientific life  
working on natural lignans.

<sup>‡</sup> Current address: Transfer Group Anti-Infectives, Leibniz Institute for Natural Product Research  
and Infection Biology, HKI, Beutenbergstraße 11a, 07745 Jena, Germany.

## Contents

|                                                                                                        |    |
|--------------------------------------------------------------------------------------------------------|----|
| <b>Table S1.</b> Antileishmanial activity and chemical structure of compounds from class <b>A</b> .    | 2  |
| <b>Table S2.</b> Antileishmanial activity and chemical structure of compounds from class <b>B</b> .    | 3  |
| <b>Table S3.</b> Feature selection by contingency analysis in MOE.                                     | 5  |
| <b>Table S4.</b> Equations describing models MLR1-MLR3.                                                | 11 |
| <b>Table S5.</b> Model performance assessment using different validation metrics.                      | 12 |
| <b>Table S6.</b> Definition of validation parameters used for assessing the performance of the models. | 13 |
| <b>Table S7.</b> Definition of consensus scoring functions.                                            | 15 |
| <b>Figure S1.</b> Comparison of models' performance using different metrics and PCA.                   | 16 |
| <b>Table S8.</b> Activity predictions by model 3D4.                                                    | 17 |
| <b>Table S9.</b> Molecular descriptors considered for model building.                                  | 18 |

**Table S1.** Chemical structure and antileishmanial activity and of compounds of class **A** \*.

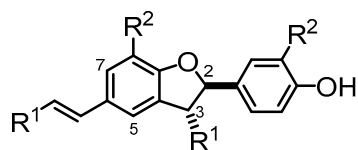

| Compound | R <sup>1</sup>                                      | R <sup>2</sup>   | IC <sub>50</sub> (μM) |
|----------|-----------------------------------------------------|------------------|-----------------------|
| 1        | COOCH <sub>3</sub>                                  | H                | 7.84                  |
| 2        | COOCH <sub>2</sub> CH <sub>3</sub>                  | H                | 7.45                  |
| 3        | COOCH(CH <sub>3</sub> ) <sub>2</sub>                | H                | 4.21                  |
| 4        | COO(CH <sub>2</sub> ) <sub>3</sub> CH <sub>3</sub>  | H                | 10.8                  |
| 5        | COOC(CH <sub>3</sub> ) <sub>3</sub>                 | H                | 6.07                  |
| 6        | COOCH <sub>3</sub>                                  | OCH <sub>3</sub> | 10.6                  |
| 7        | COOCH <sub>2</sub> CH <sub>3</sub>                  | OCH <sub>3</sub> | 9.10                  |
| 8        | COOCH(CH <sub>3</sub> ) <sub>2</sub>                | OCH <sub>3</sub> | 3.95                  |
| 9        | COO(CH <sub>2</sub> ) <sub>3</sub> CH <sub>3</sub>  | OCH <sub>3</sub> | 3.11                  |
| 10       | COOC(CH <sub>3</sub> ) <sub>3</sub>                 | OCH <sub>3</sub> | 2.10                  |
| 11       | COOCH <sub>3</sub>                                  | OH               | 12.6                  |
| 12       | COOCH <sub>2</sub> CH <sub>3</sub>                  | OH               | 3.87                  |
| 13       | COOCH(CH <sub>3</sub> ) <sub>2</sub>                | OH               | 0.54                  |
| 14       | COO(CH <sub>2</sub> ) <sub>3</sub> CH <sub>3</sub>  | OH               | 1.66                  |
| 15       | COOC(CH <sub>3</sub> ) <sub>3</sub>                 | OH               | 1.66                  |
| 16       | COO(CH <sub>2</sub> ) <sub>7</sub> CH <sub>3</sub>  | OH               | 23.5                  |
| 17       | CH <sub>2</sub> CH=CH <sub>2</sub>                  | OH               | 6.32                  |
| 18       | COOC(CH <sub>3</sub> ) <sub>3</sub>                 | F                | 1.97                  |
| 19       | CH <sub>3</sub>                                     | OCH <sub>3</sub> | 6.45                  |
| 20       | CH <sub>2</sub> OH                                  | OCH <sub>3</sub> | 160                   |
| 21       | CONH(CH <sub>2</sub> ) <sub>2</sub> CH <sub>3</sub> | OCH <sub>3</sub> | 8.88                  |
| 22       | CONHCH(CH <sub>3</sub> ) <sub>2</sub>               | OCH <sub>3</sub> | 53.6                  |
| 23       | CONHCH(CH <sub>3</sub> ) <sub>2</sub>               | OH               | 82.3                  |
| 24       | CONH(CH <sub>2</sub> ) <sub>2</sub> OH              | OCH <sub>3</sub> | 212                   |
| 25       | COCH <sub>2</sub> CH(CH <sub>3</sub> ) <sub>2</sub> | OCH <sub>3</sub> | 3.81                  |
| 26       | COCH <sub>2</sub> CH(CH <sub>3</sub> ) <sub>2</sub> | OH               | 4.42                  |
| 27       | COCH <sub>2</sub> C(CH <sub>3</sub> ) <sub>3</sub>  | OH               | 3.42                  |
| 28       | COOH                                                | OCH <sub>3</sub> | 6.89                  |

\* Data taken from [26].

**Table S2.** Chemical structure and antileishmanial activity of compounds of class **B** \*.

| Compound | R <sup>1</sup> | R <sup>2</sup>      | R <sup>3</sup>   | R <sup>4</sup>           | IC <sub>50</sub> (μM) |
|----------|----------------|---------------------|------------------|--------------------------|-----------------------|
| 29       | H              | CH <sub>3</sub>     | OH               | 3-OCH <sub>3</sub>       | 59.0                  |
| 30       | H              | CH <sub>2</sub> OH  | OH               | 3-OCH <sub>3</sub>       | 185                   |
| 31       | H              | CH <sub>3</sub>     | OCH <sub>3</sub> | -                        | 99.9                  |
| 32       | H              | CH <sub>2</sub> OH  | OCH <sub>3</sub> | 3-OCH <sub>3</sub>       | 136                   |
| 33       | H              | CH <sub>2</sub> OH  | OH               | -                        | 158                   |
| 34       | H              | CH <sub>2</sub> OH  | OCH <sub>3</sub> | -                        | 70.3                  |
| 35       | H              | CH <sub>2</sub> OAc | OCH <sub>3</sub> | -                        | 58.4                  |
| 36       | H              | CH <sub>2</sub> OH  | -                | 2-Br                     | 21.7                  |
| 37       | CHO            | CH <sub>3</sub>     | OCH <sub>3</sub> | -                        | 30.5                  |
| 38       |                | CH <sub>3</sub>     | OCH <sub>3</sub> | -                        | 17.4                  |
| 39       | Br             | CH <sub>2</sub> OH  | OH               | -                        | 18.8                  |
| 40       | Br             | CH <sub>2</sub> OAc | OH               | -                        | 13.7                  |
| 41       | Br             | CH <sub>3</sub>     | OH               | 3-OCH <sub>3</sub>       | 24.8                  |
| 42       | Br             | CH <sub>2</sub> OH  | OH               | 3-OCH <sub>3</sub>       | 30.5                  |
| 43       | Br             | CH <sub>3</sub>     | OCH <sub>3</sub> | -                        | 31.8                  |
| 44       | Br             | CH <sub>2</sub> OH  | OCH <sub>3</sub> | 3-OCH <sub>3</sub>       | 33.8                  |
| 45       | Cl             | CH <sub>3</sub>     | OH               | 3-OCH <sub>3</sub>       | 16.1                  |
| 46       | Br             | CH <sub>3</sub>     | OH               | 2-Br, 3-OCH <sub>3</sub> | 15.0                  |
| 47       | Br             | CH <sub>2</sub> OH  | OH               | 2-Br, 3-OCH <sub>3</sub> | 10.7                  |
| 48       | Br             | CH <sub>3</sub>     | OCH <sub>3</sub> | 3-Br                     | 29.7                  |
| 49       | Br             | CH <sub>2</sub> OH  | OCH <sub>3</sub> | 2-Br, 3-OCH <sub>3</sub> | 11.4                  |
| 50       | Cl             | CH <sub>3</sub>     | OH               | 3-Cl, 3-OCH <sub>3</sub> | 13.4                  |
| 51       | Br             | CH <sub>2</sub> OH  | OH               | 3-Br                     | 21.8                  |
| 52       | Br             | CH <sub>3</sub>     | OH               | 3-OCH <sub>3</sub>       | 17.2                  |
| 53       | Br             | CH <sub>2</sub> OH  | OH               | 3-OCH <sub>3</sub>       | 12.1                  |
| 54       | H              | CH <sub>2</sub> OH  | OH               | 3,5-diBr                 | 10.1                  |
| 55       | H              | CH <sub>2</sub> OH  | OH               | 3-Br                     | 43.8                  |
| 56       | H              | CH <sub>3</sub>     | OH               | 3-I, 5-OCH <sub>3</sub>  | 13.4                  |
| 57       |                | CH <sub>3</sub>     | OCH <sub>3</sub> | -                        | 4.01                  |
| 58       |                | CH <sub>2</sub> OH  | OCH <sub>3</sub> | 3-OCH <sub>3</sub>       | 10.7                  |
| 59       |                | CH <sub>2</sub> OH  | OH               | -                        | 17.1                  |
| 60       | Br             | CH <sub>2</sub> OH  | OH               | 3-OH                     | 17.8                  |
| 61       | Br             | CH <sub>3</sub>     | OH               | -                        | 32.5                  |

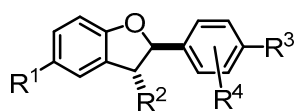

| Compound | R <sup>1</sup> | R <sup>2</sup>     | R <sup>3</sup>                    | R <sup>4</sup>     | IC <sub>50</sub> (μM) |
|----------|----------------|--------------------|-----------------------------------|--------------------|-----------------------|
| 62       |                | CH <sub>3</sub>    | OH                                | -                  | 5.64                  |
| 63       |                |                    | OAc                               | -                  | 2.06                  |
| 64       |                |                    | OC(CH <sub>3</sub> ) <sub>3</sub> | -                  | 13.1                  |
| 65       |                | CH <sub>2</sub> F  | OCH <sub>3</sub>                  | 3-OCH <sub>3</sub> | 13.0                  |
| 66       | H              |                    |                                   | -                  | 6.31                  |
| 67       |                | CH <sub>2</sub> OH | OH                                | -                  | 16.5                  |
| 68       |                | CH <sub>2</sub> OH | OH                                | -                  | 37.7                  |
| 69       |                | CH <sub>2</sub> OH | OH                                | -                  | 18.8                  |
| 70       |                | CH <sub>2</sub> OH | OH                                | -                  | 16.1                  |

\* Data taken from [26].

**Table S3.** Feature selection by contingency analysis in MOE.

| #  | Contingency<br>coeff. | Cramér's V | Entropic<br>Uncertainty | Linear R <sup>2</sup> | Descriptor        | Decision |
|----|-----------------------|------------|-------------------------|-----------------------|-------------------|----------|
| 2  | 0.81328               | 0.40348    | 0.38035                 | 0.30404               | AM1_E             | Yes      |
| 3  | 0.79824               | 0.38256    | 0.34126                 | 0.25895               | AM1_Eele          | Yes      |
| 4  | 0.79003               | 0.372      | 0.34153                 | 0.26312               | AM1_HF            | Yes      |
| 5  | 0.69529               | 0.27926    | 0.21752                 | 0.03011               | AM1_HOMO          | No       |
| 6  | 0.71633               | 0.29635    | 0.21971                 | 0.03011               | AM1_IP            | No       |
| 7  | 0.79392               | 0.37694    | 0.35629                 | 0.37622               | AM1_LUMO          | Yes      |
| 8  | 0.77034               | 0.34875    | 0.33147                 | 0.26152               | apol              | Yes      |
| 9  | 0.76777               | 0.34592    | 0.32748                 | 0.31618               | ASA               | Yes      |
| 12 | 0.76777               | 0.34592    | 0.32748                 | 0.31618               | ASA_H             | Yes      |
| 16 | 0.71398               | 0.29437    | 0.22812                 | 0.26918               | ast_violation     | Yes      |
| 17 | 0.78098               | 0.36098    | 0.32977                 | 0.26624               | ast_violation_ext | Yes      |
| 18 | 0.70396               | 0.28613    | 0.24942                 | 0.10166               | a_acc             | No       |
| 22 | 0.908                 | 0.28216    | 0.51381                 | 0.23133               | a_count           | Yes      |
| 24 | 0.7692                | 0.33385    | 0.29296                 | 0.03348               | a_donacc          | No       |
| 25 | 0.83202               | 0.29414    | 0.39592                 | 0.28372               | a_heavy           | Yes      |
| 26 | 0.8292                | 0.34033    | 0.40469                 | 0.26452               | a_hyd             | Yes      |
| 27 | 0.78252               | 0.3628     | 0.35866                 | 0.23241               | a_IC              | Yes      |
| 28 | 0.71878               | 0.29845    | 0.26886                 | 0.00033               | a_ICM             | No       |
| 31 | 0.8096                | 0.30098    | 0.37079                 | 0.26351               | a_nC              | Yes      |
| 34 | 0.84457               | 0.26289    | 0.42841                 | 0.17837               | a_nH              | No       |
| 37 | 0.72574               | 0.30453    | 0.28158                 | 0.26038               | a_nO              | Yes      |
| 41 | 0.74084               | 0.3184     | 0.30476                 | 0.05245               | BCUT_PEOE_0       | No       |
| 42 | 0.77105               | 0.34955    | 0.32271                 | 0.19028               | BCUT_PEOE_1       | No       |
| 43 | 0.76336               | 0.34113    | 0.28805                 | 0.16175               | BCUT_PEOE_2       | No       |
| 44 | 0.74175               | 0.31926    | 0.25288                 | 0.07257               | BCUT_PEOE_3       | No       |
| 45 | 0.78868               | 0.37032    | 0.35583                 | 0.01235               | BCUT_SLOGP_0      | No       |
| 46 | 0.77863               | 0.35822    | 0.30124                 | 0.20128               | BCUT_SLOGP_1      | Yes      |
| 47 | 0.77614               | 0.35532    | 0.29359                 | 0.16393               | BCUT_SLOGP_2      | No       |
| 48 | 0.72364               | 0.30267    | 0.2664                  | 0.03064               | BCUT_SLOGP_3      | No       |
| 49 | 0.78919               | 0.37096    | 0.36856                 | 0.07489               | BCUT_SMR_0        | No       |
| 50 | 0.71194               | 0.29266    | 0.22733                 | 0.15731               | BCUT_SMR_1        | No       |
| 51 | 0.76139               | 0.33903    | 0.30727                 | 0.12927               | BCUT_SMR_2        | No       |
| 52 | 0.74679               | 0.32415    | 0.3191                  | 0.00414               | BCUT_SMR_3        | No       |
| 53 | 0.79045               | 0.37253    | 0.33159                 | 0.223                 | bpol              | Yes      |
| 54 | 0.7489                | 0.25926    | 0.28193                 | 0.07479               | b_1rotN           | No       |
| 55 | 0.70248               | 0.28494    | 0.20926                 | 0.03375               | b_1rotR           | No       |
| 57 | 0.90949               | 0.28481    | 0.52067                 | 0.23139               | b_count           | Yes      |
| 58 | 0.69412               | 0.27835    | 0.25373                 | 0.291                 | b_double          | Yes      |
| 59 | 0.83826               | 0.30149    | 0.40014                 | 0.28016               | b_heavy           | Yes      |
| 60 | 0.67444               | 0.2637     | 0.20523                 | 0.00888               | b_max1len         | No       |
| 61 | 0.77026               | 0.26357    | 0.30449                 | 0.1559                | b_rotN            | No       |
| 62 | 0.71759               | 0.29743    | 0.26584                 | 0.13141               | b_rotR            | No       |
| 63 | 0.89097               | 0.26222    | 0.45792                 | 0.21207               | b_single          | Yes      |
| 67 | 0.77313               | 0.35188    | 0.35335                 | 0.30093               | chi0              | Yes      |

| #   | Contingency<br>coeff. | Cramér's V | Entropic<br>Uncertainty | Linear R <sup>2</sup> | Descriptor   | Decision |
|-----|-----------------------|------------|-------------------------|-----------------------|--------------|----------|
| 68  | 0.80122               | 0.38654    | 0.37878                 | 0.31759               | chi0v        | Yes      |
| 69  | 0.7784                | 0.35794    | 0.34557                 | 0.25953               | chi0v_C      | Yes      |
| 70  | 0.76446               | 0.34232    | 0.31708                 | 0.26328               | chi0_C       | Yes      |
| 71  | 0.73629               | 0.31412    | 0.2976                  | 0.25823               | chi1         | Yes      |
| 72  | 0.77045               | 0.34887    | 0.33574                 | 0.27264               | chi1v        | Yes      |
| 73  | 0.74716               | 0.32451    | 0.32002                 | 0.25122               | chi1v_C      | Yes      |
| 74  | 0.72511               | 0.30396    | 0.30916                 | 0.24935               | chi1_C       | Yes      |
| 79  | 0.75213               | 0.32946    | 0.31004                 | 0.0051                | dens         | No       |
| 80  | 0.72409               | 0.30306    | 0.287                   | 0.00459               | density      | No       |
| 81  | 0.79123               | 0.29684    | 0.38293                 | 0.19691               | diameter     | No       |
| 86  | 0.66342               | 0.25595    | 0.22295                 | 0.03612               | E            | No       |
| 88  | 0.75803               | 0.33551    | 0.327                   | 0.16386               | E_ele        | No       |
| 89  | 0.75931               | 0.33684    | 0.28382                 | 0.13445               | E_nb         | No       |
| 90  | 0.75706               | 0.3345     | 0.29178                 | 0.03439               | E_oop        | No       |
| 95  | 0.79329               | 0.37612    | 0.31248                 | 0.00515               | E_sol        | No       |
| 97  | 0.63791               | 0.23912    | 0.21431                 | 0.09811               | E_str        | No       |
| 98  | 0.71099               | 0.29187    | 0.261                   | 0.09433               | E_strain     | No       |
| 99  | 0.7754                | 0.35448    | 0.34419                 | 0.08839               | E_tor        | No       |
| 100 | 0.76455               | 0.34241    | 0.2849                  | 0.23431               | E_vdw        | Yes      |
| 108 | 0.72879               | 0.30724    | 0.26885                 | 0.23606               | GCUT_PEOE_0  | Yes      |
| 109 | 0.71106               | 0.29193    | 0.23466                 | 0.01643               | GCUT_PEOE_1  | No       |
| 110 | 0.7768                | 0.35609    | 0.27043                 | 0.12631               | GCUT_PEOE_2  | No       |
| 111 | 0.78803               | 0.36951    | 0.33146                 | 0.23193               | GCUT_PEOE_3  | Yes      |
| 113 | 0.70318               | 0.2855     | 0.22766                 | 0.16233               | GCUT_SLOGP_1 | No       |
| 114 | 0.7267                | 0.30538    | 0.27005                 | 0.18626               | GCUT_SLOGP_2 | No       |
| 115 | 0.77938               | 0.35909    | 0.33823                 | 0.24391               | GCUT_SLOGP_3 | Yes      |
| 116 | 0.79455               | 0.37775    | 0.36045                 | 0.06445               | GCUT_SMR_0   | No       |
| 117 | 0.71207               | 0.29277    | 0.23084                 | 0.03826               | GCUT_SMR_1   | No       |
| 118 | 0.78667               | 0.36784    | 0.326                   | 0.04582               | GCUT_SMR_2   | No       |
| 119 | 0.78048               | 0.36039    | 0.33189                 | 0.23469               | GCUT_SMR_3   | Yes      |
| 120 | 0.72051               | 0.29994    | 0.2195                  | 0.02008               | glob         | No       |
| 121 | 0.78386               | 0.36442    | 0.3611                  | 0.22253               | h_ema        | Yes      |
| 122 | 0.81199               | 0.40159    | 0.35803                 | 0.1117                | h_emd        | No       |
| 123 | 0.76473               | 0.34261    | 0.30946                 | 0.18992               | h_emd_C      | No       |
| 124 | 0.76367               | 0.34146    | 0.29239                 | 0.20665               | h_logD       | Yes      |
| 125 | 0.77756               | 0.35696    | 0.30073                 | 0.21594               | h_logP       | Yes      |
| 126 | 0.80936               | 0.39781    | 0.35858                 | 0.32336               | h_logS       | Yes      |
| 128 | 0.7392                | 0.31684    | 0.29671                 | 0.26375               | h_log_pbo    | Yes      |
| 129 | 0.76545               | 0.34338    | 0.32111                 | 0.28387               | h_mr         | Yes      |
| 135 | 0.79548               | 0.37895    | 0.3514                  | 0.28532               | Kier1        | Yes      |
| 136 | 0.74019               | 0.31778    | 0.29021                 | 0.19055               | Kier2        | No       |
| 137 | 0.80649               | 0.39376    | 0.3661                  | 0.26369               | Kier3        | Yes      |
| 138 | 0.79852               | 0.38293    | 0.37956                 | 0.31384               | KierA1       | Yes      |
| 139 | 0.7463                | 0.32367    | 0.30433                 | 0.20783               | KierA2       | Yes      |
| 140 | 0.79112               | 0.37337    | 0.35759                 | 0.27894               | KierA3       | Yes      |

| #   | Contingency<br>coeff. | Cramér's V | Entropic<br>Uncertainty | Linear R <sup>2</sup> | Descriptor     | Decision |
|-----|-----------------------|------------|-------------------------|-----------------------|----------------|----------|
| 141 | 0.76393               | 0.34174    | 0.25824                 | 0.20898               | KierFlex       | Yes      |
| 142 | 0.77097               | 0.34946    | 0.31072                 | 0.17618               | lip_acc        | No       |
| 146 | 0.82297               | 0.4182     | 0.35541                 | 0.33057               | logP(o/w)      | Yes      |
| 147 | 0.80069               | 0.38582    | 0.34452                 | 0.303                 | logS           | Yes      |
| 149 | 0.81328               | 0.40348    | 0.38035                 | 0.30291               | MNDO_E         | Yes      |
| 150 | 0.81698               | 0.40898    | 0.35177                 | 0.26571               | MNDO_Eele      | Yes      |
| 151 | 0.74768               | 0.32503    | 0.29428                 | 0.17347               | MNDO_HF        | No       |
| 152 | 0.72657               | 0.30526    | 0.23824                 | 0.05427               | MNDO_HOMO      | No       |
| 153 | 0.71454               | 0.29485    | 0.22939                 | 0.05427               | MNDO_IP        | No       |
| 155 | 0.75361               | 0.33097    | 0.31425                 | 0.28057               | mr             | Yes      |
| 158 | 0.75409               | 0.33145    | 0.27931                 | 0.00235               | npr1           | No       |
| 159 | 0.7322                | 0.31034    | 0.26987                 | 0.00007               | npr2           | No       |
| 160 | 0.64823               | 0.22752    | 0.2554                  | 0.02199               | opr_brigid     | No       |
| 163 | 0.75658               | 0.26544    | 0.30268                 | 0.12194               | opr_nrot       | No       |
| 164 | 0.64709               | 0.24501    | 0.22701                 | 0.17129               | opr_violation  | No       |
| 167 | 0.77215               | 0.35078    | 0.32007                 | 0.1694                | PEOE_PC+       | No       |
| 168 | 0.75737               | 0.33482    | 0.31139                 | 0.1694                | PEOE_PC-       | No       |
| 169 | 0.74689               | 0.32425    | 0.29318                 | 0.02014               | PEOE_RPC+      | No       |
| 170 | 0.77546               | 0.35454    | 0.35688                 | 0.2386                | PEOE_RPC-      | Yes      |
| 171 | 0.76762               | 0.34575    | 0.31059                 | 0.17057               | PEOE_VSA+0     | No       |
| 172 | 0.73567               | 0.31354    | 0.27482                 | 0.11071               | PEOE_VSA+1     | No       |
| 173 | 0.72329               | 0.30236    | 0.27538                 | 0.11199               | PEOE_VSA+2     | No       |
| 176 | 0.64907               | 0.24631    | 0.22237                 | 0.37385               | PEOE_VSA+5     | Yes      |
| 178 | 0.80146               | 0.38686    | 0.37998                 | 0.26234               | PEOE_VSA-0     | Yes      |
| 179 | 0.71817               | 0.29793    | 0.25977                 | 0.01867               | PEOE_VSA-1     | No       |
| 183 | 0.67339               | 0.26294    | 0.24094                 | 0.30193               | PEOE_VSA-5     | Yes      |
| 184 | 0.75949               | 0.33703    | 0.27635                 | 0.03108               | PEOE_VSA-6     | No       |
| 185 | 0.80449               | 0.391      | 0.30181                 | 0.14166               | PEOE_VSA_FHYD  | No       |
| 186 | 0.78119               | 0.36122    | 0.32307                 | 0.00575               | PEOE_VSA_FNEG  | No       |
| 187 | 0.79079               | 0.37295    | 0.34674                 | 0.19011               | PEOE_VSA_FPNEG | No       |
| 188 | 0.80704               | 0.39453    | 0.31123                 | 0.14166               | PEOE_VSA_FPOL  | No       |
| 189 | 0.79334               | 0.3762     | 0.33215                 | 0.00575               | PEOE_VSA_FPOS  | No       |
| 190 | 0.79641               | 0.38016    | 0.28139                 | 0.08341               | PEOE_VSA_FPPOS | No       |
| 191 | 0.76549               | 0.34343    | 0.29665                 | 0.22032               | PEOE_VSA_HYD   | Yes      |
| 192 | 0.80021               | 0.38518    | 0.34784                 | 0.38479               | PEOE_VSA_NEG   | Yes      |
| 193 | 0.79919               | 0.38383    | 0.36957                 | 0.28054               | PEOE_VSA_PNEG  | Yes      |
| 194 | 0.8139                | 0.40439    | 0.35802                 | 0.24361               | PEOE_VSA_POL   | Yes      |
| 195 | 0.775                 | 0.35402    | 0.33603                 | 0.12012               | PEOE_VSA_POS   | No       |
| 196 | 0.79084               | 0.37302    | 0.31549                 | 0.17357               | PEOE_VSA_PPOS  | No       |
| 197 | 0.70034               | 0.28323    | 0.28582                 | 0.00038               | petitjean      | No       |
| 198 | 0.73845               | 0.31614    | 0.31818                 | 0.00105               | petitjeanSC    | No       |
| 200 | 0.80967               | 0.39826    | 0.37194                 | 0.30978               | PM3_E          | Yes      |
| 201 | 0.80087               | 0.38606    | 0.34191                 | 0.261                 | PM3_Eele       | Yes      |
| 202 | 0.78899               | 0.3707     | 0.33726                 | 0.28001               | PM3_HF         | Yes      |
| 203 | 0.68106               | 0.2685     | 0.22423                 | 0.00004               | PM3_HOMO       | No       |

| #   | Contingency<br>coeff. | Cramér's V | Entropic<br>Uncertainty | Linear R <sup>2</sup> | Descriptor | Decision |
|-----|-----------------------|------------|-------------------------|-----------------------|------------|----------|
| 204 | 0.71527               | 0.29546    | 0.23452                 | 0.00004               | PM3_IP     | No       |
| 205 | 0.79139               | 0.37372    | 0.33789                 | 0.35832               | PM3_LUMO   | Yes      |
| 206 | 0.76859               | 0.34682    | 0.32835                 | 0.29965               | pmi        | Yes      |
| 207 | 0.78498               | 0.36577    | 0.36936                 | 0.25712               | pmi1       | Yes      |
| 208 | 0.76225               | 0.33994    | 0.32815                 | 0.28971               | pmi2       | Yes      |
| 209 | 0.79852               | 0.38293    | 0.34363                 | 0.29635               | pmi3       | Yes      |
| 210 | 0.81149               | 0.40087    | 0.38257                 | 0.24743               | pmiX       | Yes      |
| 211 | 0.73542               | 0.31331    | 0.26299                 | 0.09327               | pmiY       | No       |
| 212 | 0.83951               | 0.44602    | 0.38887                 | 0.32992               | pmiZ       | Yes      |
| 304 | 0.81202               | 0.40164    | 0.37802                 | 0.28996               | Q_VSA_HYD  | Yes      |
| 308 | 0.81202               | 0.40164    | 0.37802                 | 0.28996               | Q_VSA_POS  | Yes      |
| 310 | 0.71743               | 0.29729    | 0.29411                 | 0.20119               | radius     | Yes      |
| 312 | 0.78481               | 0.36557    | 0.35944                 | 0.32043               | rgyr       | Yes      |
| 316 | 0.7745                | 0.35344    | 0.32169                 | 0.18359               | rsynth     | No       |
| 317 | 0.79138               | 0.37369    | 0.31479                 | 0.23819               | SlogP      | Yes      |
| 318 | 0.75007               | 0.32739    | 0.23233                 | 0.01223               | SlogP_VSA0 | No       |
| 320 | 0.78776               | 0.36918    | 0.32962                 | 0.36507               | SlogP_VSA2 | Yes      |
| 322 | 0.65447               | 0.24988    | 0.24607                 | 0.01121               | SlogP_VSA4 | No       |
| 327 | 0.78668               | 0.36785    | 0.35622                 | 0.29909               | SlogP_VSA9 | Yes      |
| 328 | 0.78232               | 0.36256    | 0.33996                 | 0.28374               | SMR        | Yes      |
| 329 | 0.71622               | 0.29627    | 0.29568                 | 0.3538                | SMR_VSA0   | Yes      |
| 330 | 0.74311               | 0.32058    | 0.26968                 | 0.0002                | SMR_VSA1   | No       |
| 332 | 0.78448               | 0.36517    | 0.30415                 | 0.11904               | SMR_VSA3   | No       |
| 335 | 0.76945               | 0.34776    | 0.33449                 | 0.04564               | SMR_VSA6   | No       |
| 336 | 0.74855               | 0.32589    | 0.2649                  | 0.21121               | SMR_VSA7   | Yes      |
| 337 | 0.76226               | 0.33996    | 0.32527                 | 0.24128               | std_dim1   | Yes      |
| 338 | 0.7561                | 0.33351    | 0.31675                 | 0.21048               | std_dim2   | Yes      |
| 339 | 0.81262               | 0.40251    | 0.35272                 | 0.13501               | std_dim3   | No       |
| 340 | 0.7805                | 0.36041    | 0.34041                 | 0.1597                | TPSA       | No       |
| 341 | 0.78579               | 0.36676    | 0.34637                 | 0.31047               | VAdjEq     | Yes      |
| 342 | 0.78287               | 0.36323    | 0.35048                 | 0.29577               | VAdjMa     | Yes      |
| 343 | 0.75061               | 0.32793    | 0.32411                 | 0.25408               | VDistEq    | Yes      |
| 344 | 0.78309               | 0.36349    | 0.36067                 | 0.30127               | VDistMa    | Yes      |
| 345 | 0.81202               | 0.40164    | 0.37802                 | 0.28996               | vdw_area   | Yes      |
| 346 | 0.77538               | 0.35445    | 0.32933                 | 0.27655               | vdw_vol    | Yes      |
| 347 | 0.76894               | 0.34721    | 0.32527                 | 0.28111               | vol        | Yes      |
| 348 | 0.74251               | 0.32       | 0.31119                 | 0.28159               | VSA        | Yes      |
| 349 | 0.67352               | 0.26304    | 0.22504                 | 0.20761               | vsa_acc    | Yes      |
| 353 | 0.79638               | 0.38011    | 0.31941                 | 0.24557               | vsa_hyd    | Yes      |
| 354 | 0.74589               | 0.32327    | 0.32659                 | 0.31403               | vsa_other  | Yes      |
| 355 | 0.7809                | 0.36088    | 0.32071                 | 0.12456               | vsa_pol    | No       |
| 356 | 0.77425               | 0.35316    | 0.32056                 | 0.00154               | vsurf_A    | No       |
| 357 | 0.68974               | 0.27499    | 0.21223                 | 0.05873               | vsurf_CP   | No       |
| 358 | 0.7929                | 0.37563    | 0.33488                 | 0.23931               | vsurf_CW1  | Yes      |
| 359 | 0.76529               | 0.34321    | 0.29271                 | 0.08084               | vsurf_CW2  | No       |



| #   | Contingency<br>coeff. | Cramér's V | Entropic<br>Uncertainty | Linear R <sup>2</sup> | Descriptor   | Decision |
|-----|-----------------------|------------|-------------------------|-----------------------|--------------|----------|
| 360 | 0.74712               | 0.32447    | 0.26188                 | 0.02133               | vsurf_CW3    | No       |
| 361 | 0.71521               | 0.29541    | 0.24449                 | 0.01185               | vsurf_CW4    | No       |
| 362 | 0.6983                | 0.28162    | 0.22844                 | 0.00721               | vsurf_CW5    | No       |
| 366 | 0.77478               | 0.35376    | 0.29993                 | 0.29927               | vsurf_D1     | Yes      |
| 367 | 0.78386               | 0.36441    | 0.30891                 | 0.30239               | vsurf_D2     | Yes      |
| 368 | 0.80203               | 0.38763    | 0.31367                 | 0.30026               | vsurf_D3     | Yes      |
| 369 | 0.82734               | 0.4252     | 0.35303                 | 0.27628               | vsurf_D4     | Yes      |
| 370 | 0.77623               | 0.35543    | 0.28488                 | 0.23811               | vsurf_D5     | Yes      |
| 371 | 0.76308               | 0.34084    | 0.27766                 | 0.11491               | vsurf_D6     | No       |
| 372 | 0.68781               | 0.27353    | 0.23081                 | 0.06904               | vsurf_D7     | No       |
| 373 | 0.76459               | 0.34246    | 0.32053                 | 0.15316               | vsurf_D8     | No       |
| 374 | 0.74908               | 0.32641    | 0.20968                 | 0.00215               | vsurf_DD12   | No       |
| 375 | 0.71212               | 0.29282    | 0.2143                  | 0.02527               | vsurf_DD13   | No       |
| 376 | 0.69928               | 0.28239    | 0.22822                 | 0.05385               | vsurf_DD23   | No       |
| 379 | 0.70078               | 0.28357    | 0.21544                 | 0.02272               | vsurf_DW23   | No       |
| 381 | 0.69997               | 0.28293    | 0.22321                 | 0.04913               | vsurf_EDmin2 | No       |
| 382 | 0.70554               | 0.2874     | 0.24136                 | 0.05264               | vsurf_EDmin3 | No       |
| 383 | 0.73199               | 0.31015    | 0.23993                 | 0.08894               | vsurf_EWmin1 | No       |
| 384 | 0.74246               | 0.31994    | 0.23273                 | 0.08111               | vsurf_EWmin2 | No       |
| 385 | 0.75311               | 0.33045    | 0.23987                 | 0.10871               | vsurf_EWmin3 | No       |
| 386 | 0.80534               | 0.39216    | 0.37562                 | 0.33646               | vsurf_G      | Yes      |
| 387 | 0.79538               | 0.37882    | 0.36785                 | 0.14505               | vsurf_HB1    | No       |
| 388 | 0.77233               | 0.35098    | 0.35316                 | 0.1653                | vsurf_HB2    | No       |
| 389 | 0.7506                | 0.32792    | 0.30706                 | 0.19516               | vsurf_HB3    | No       |
| 390 | 0.74996               | 0.32728    | 0.30663                 | 0.1191                | vsurf_HB4    | No       |
| 391 | 0.70958               | 0.29071    | 0.24143                 | 0.05666               | vsurf_HB5    | No       |
| 397 | 0.76376               | 0.34157    | 0.27924                 | 0.081                 | vsurf_ID1    | No       |
| 398 | 0.78629               | 0.36737    | 0.28913                 | 0.08961               | vsurf_ID2    | No       |
| 399 | 0.82757               | 0.42557    | 0.33484                 | 0.14876               | vsurf_ID3    | No       |
| 400 | 0.79498               | 0.3783     | 0.30541                 | 0.16614               | vsurf_ID4    | No       |
| 401 | 0.7874                | 0.36873    | 0.28666                 | 0.15443               | vsurf_ID5    | No       |
| 402 | 0.7906                | 0.37271    | 0.28115                 | 0.00965               | vsurf_ID6    | No       |
| 403 | 0.69446               | 0.27861    | 0.24234                 | 0.00556               | vsurf_ID7    | No       |
| 404 | 0.74213               | 0.31963    | 0.29096                 | 0.01872               | vsurf_ID8    | No       |
| 405 | 0.71401               | 0.2944     | 0.25243                 | 0.07175               | vsurf_IW1    | No       |
| 406 | 0.75551               | 0.3329     | 0.28444                 | 0.00191               | vsurf_IW2    | No       |
| 407 | 0.7359                | 0.31375    | 0.28389                 | 0.03454               | vsurf_IW3    | No       |
| 408 | 0.76685               | 0.34491    | 0.30913                 | 0.02496               | vsurf_IW4    | No       |
| 409 | 0.76263               | 0.34035    | 0.3143                  | 0.01156               | vsurf_IW5    | No       |
| 410 | 0.73195               | 0.31011    | 0.27726                 | 0.00002               | vsurf_IW6    | No       |
| 411 | 0.72062               | 0.30003    | 0.24334                 | 0.08157               | vsurf_IW7    | No       |
| 412 | 0.69494               | 0.27899    | 0.24608                 | 0.05261               | vsurf_IW8    | No       |
| 413 | 0.77099               | 0.34948    | 0.30724                 | 0.11241               | vsurf_R      | No       |
| 414 | 0.79746               | 0.38153    | 0.35303                 | 0.31377               | vsurf_S      | Yes      |
| 415 | 0.78446               | 0.36514    | 0.3484                  | 0.30032               | vsurf_V      | Yes      |

| #   | Contingency<br>coeff. | Cramér's V | Entropic<br>Uncertainty | Linear R <sup>2</sup> | Descriptor | Decision |
|-----|-----------------------|------------|-------------------------|-----------------------|------------|----------|
| 416 | 0.76597               | 0.34395    | 0.36344                 | 0.27151               | vsurf_W1   | Yes      |
| 417 | 0.78717               | 0.36845    | 0.33961                 | 0.18362               | vsurf_W2   | No       |
| 418 | 0.77258               | 0.35126    | 0.32497                 | 0.15609               | vsurf_W3   | No       |
| 419 | 0.76054               | 0.33814    | 0.30791                 | 0.08902               | vsurf_W4   | No       |
| 420 | 0.69904               | 0.2822     | 0.23026                 | 0.04599               | vsurf_W5   | No       |
| 424 | 0.75723               | 0.33468    | 0.31818                 | 0.30398               | vsurf_Wp1  | Yes      |
| 425 | 0.82599               | 0.42301    | 0.38437                 | 0.16848               | vsurf_Wp2  | No       |
| 426 | 0.82086               | 0.41489    | 0.30323                 | 0.01134               | vsurf_Wp3  | No       |
| 427 | 0.76619               | 0.34419    | 0.27452                 | 0.02639               | vsurf_Wp4  | No       |
| 428 | 0.73778               | 0.31551    | 0.21752                 | 0.03352               | vsurf_Wp5  | No       |
| 432 | 0.79647               | 0.38024    | 0.33862                 | 0.31461               | Weight     | Yes      |
| 433 | 0.76733               | 0.34543    | 0.33355                 | 0.21857               | weinerPath | Yes      |
| 434 | 0.88475               | 0.32087    | 0.48244                 | 0.27351               | weinerPol  | Yes      |
| 435 | 0.79935               | 0.38404    | 0.37815                 | 0.31191               | zagreb     | Yes      |

**Table S4.** Equations describing models MLR1-MLR3.

| Model | Equation                                                                                                                                                                                                                    |
|-------|-----------------------------------------------------------------------------------------------------------------------------------------------------------------------------------------------------------------------------|
| MLR1  | $17.0056 - 0.910189 \times \text{AM1\_LUMO} + 16.3448 \times \text{GCUT\_PEOE\_0} + 0.000489367 \times \text{VSA} - 0.237012 \times \text{radius} + 0.00037054 \times \text{vsa\_hyd} + 0.00396902 \times \text{vsurf\_D3}$ |
| MLR2  | $2.85947 + 0.798618 \times \text{SlogP} + 0.14958 \times \text{b\_double} - 0.0482161 \times \text{b\_single} + 0.27467 \times \text{h\_ema} - 0.371147 \times \text{h\_logP}$                                              |
| MLR3  | $12.466 + 0.00809057 \times \text{ASA} + 14.8266 \times \text{GCUT\_PEOE\_0} + 0.63541 \times \text{VDistEq} - 0.0546541 \times \text{b\_single} + 0.190234 \times \text{chi1v\_C} - 0.371497 \times \text{radius}$         |

**Table S5.** Model performance assessment using different validation metrics.

| Model         | $R^2$ | $Q^2$ | $R_{pred}^2$ | $R_0^2$ | $R_0'^2$ | $R_p^2$ | $Q_{F2}^2$ | $Q_{F3}^2$ | CCC   | MAE   | $\sigma_{MAE}$ | $\overline{R_m^2}$ | $\Delta R_m^2$ |
|---------------|-------|-------|--------------|---------|----------|---------|------------|------------|-------|-------|----------------|--------------------|----------------|
| MLR1          | 0.731 | 0.648 | 0.708        | 0.715   | 0.522    | 0.722   | 0.705      | 0.614      | 0.817 | 0.507 | 0.207          | 0.625              | 0.048          |
| MLR2          | 0.706 | 0.605 | 0.679        | 0.719   | 0.508    | 0.730   | 0.675      | 0.575      | 0.805 | 0.538 | 0.215          | 0.635              | 0.037          |
| MLR3          | 0.716 | 0.626 | 0.671        | 0.691   | 0.432    | 0.701   | 0.667      | 0.564      | 0.790 | 0.490 | 0.246          | 0.598              | 0.163          |
| RF1           | 0.918 | 0.510 | 0.784        | 0.785   | 0.556    | 0.834   | 0.783      | 0.745      | 0.856 | 0.462 | 0.148          | 0.751              | 0.136          |
| RF2           | 0.812 | 0.462 | 0.788        | 0.786   | 0.669    | 0.793   | 0.785      | 0.802      | 0.870 | 0.443 | 0.116          | 0.687              | 0.169          |
| RF3           | 0.897 | 0.538 | 0.710        | 0.596   | 0.236    | 0.598   | 0.576      | 0.759      | 0.729 | 0.491 | 0.137          | 0.483              | 0.021          |
| SVM1          | 0.826 | 0.702 | 0.726        | 0.718   | 0.629    | 0.719   | 0.693      | 0.723      | 0.832 | 0.518 | 0.139          | 0.559              | 0.233          |
| SVM2          | 0.891 | 0.604 | 0.717        | 0.726   | 0.421    | 0.761   | 0.713      | 0.625      | 0.808 | 0.530 | 0.186          | 0.674              | 0.076          |
| SVM3          | 0.838 | 0.709 | 0.620        | 0.619   | 0.435    | 0.620   | 0.618      | 0.552      | 0.772 | 0.629 | 0.185          | 0.416              | 0.284          |
| 3D1           | 0.936 | 0.659 | 0.775        | 0.775   | 0.747    | 0.779   | 0.775      | 0.777      | 0.881 | 0.187 | 0.170          | 0.669              | 0.177          |
| 3D2           | 0.934 | 0.694 | 0.715        | 0.723   | 0.694    | 0.732   | 0.715      | 0.725      | 0.852 | 0.233 | 0.157          | 0.635              | 0.101          |
| 3D3           | 0.923 | 0.644 | 0.765        | 0.757   | 0.700    | 0.758   | 0.765      | 0.773      | 0.865 | 0.212 | 0.143          | 0.669              | 0.077          |
| 3D4           | 0.932 | 0.624 | 0.793        | 0.801   | 0.828    | 0.828   | 0.793      | 0.822      | 0.905 | 0.187 | 0.134          | 0.658              | 0.164          |
| 3D5           | 0.909 | 0.618 | 0.841        | 0.826   | 0.796    | 0.826   | 0.841      | 0.816      | 0.906 | 0.203 | 0.099          | 0.761              | 0.048          |
| CoefVar * (%) | 10.3  | 12.7  | 7.0          | 8.3     | 27.5     | 9.2     | 9.3        | 13.6       | 5.5   | 33.0  | 22.3           | 15.0               | 64.3           |

\* CoefVar = Coefficient of Variation.

**Table S6.** Definition of validation parameters used for assessing the performance of the models.

| Parameter | Mathematical Definition                                                                                                                               | Reference  |
|-----------|-------------------------------------------------------------------------------------------------------------------------------------------------------|------------|
| 1         | $R^2 = 1 - \frac{\sum(Y_{obs} - Y_{pred})^2}{\sum(Y_{obs} - \bar{Y}_{obs})^2}$                                                                        | [64]       |
| 2         | $Q^2 = 1 - \frac{\sum(Y_{obs} - Y_{pred(LOO)})^2}{\sum(Y_{obs} - \bar{Y}_{obs})^2}$                                                                   | [64]       |
| 3         | $R_{pred}^2 = 1 - \frac{\sum(Y_{obs(test)} - Y_{pred(test)})^2}{\sum(Y_{obs(test)} - \bar{Y}_{train})^2}$                                             | [64]       |
| 4         | $R_p^2 = \frac{\sum(Y_{obs} - \bar{Y}_{obs})(Y_{pred} - \bar{Y}_{pred})}{\sqrt{\{\sum(Y_{obs} - \bar{Y}_{obs})\}[\sum(Y_{pred} - \bar{Y}_{pred})\]}}$ | [35]       |
| 5         | $k = \frac{\sum Y_{obs} Y_{pred}}{\sum Y_{pred}^2}$                                                                                                   | [35]       |
| 6         | $k' = \frac{\sum Y_{obs} Y_{pred}}{\sum Y_{obs}^2}$                                                                                                   | [35]       |
| 7 *       | $R_0^2 = 1 - \frac{\sum(Y_{pred} - kY_{pred})^2}{\sum(Y_{pred} - \bar{Y}_{pred})^2}$                                                                  | [35]       |
| 8 *       | $R_0'^2 = 1 - \frac{\sum(Y_{obs} - k'Y_{obs})^2}{\sum(Y_{obs} - \bar{Y}_{obs})^2}$                                                                    | [35]       |
| 9         | $R_m^2 = R_p^2 \times \left(1 - \sqrt{(R_p^2 - R_0^2)}\right)$                                                                                        | [57,65,66] |
| 10        | $R_m'^2 = R_p^2 \times \left(1 - \sqrt{(R_p^2 - R_0'^2)}\right)$                                                                                      | [57,65,66] |
| 11        | $\bar{R}_m^2 = \frac{R_m^2 + R_m'^2}{2}$                                                                                                              | [57,65,66] |
| 12        | $\Delta R_m^2 =  R_m^2 - R_m'^2 $                                                                                                                     | [57,65,66] |
| 13        | $Q_{F2}^2 = 1 - \frac{\sum(Y_{obs(test)} - Y_{pred(test)})^2}{\sum(Y_{obs(test)} - \bar{Y}_{test})^2}$                                                | [60]       |

| Parameter | Mathematical Definition                                                                                                                                                                                                   | Reference |
|-----------|---------------------------------------------------------------------------------------------------------------------------------------------------------------------------------------------------------------------------|-----------|
| 14        | $Q^2_{F3} = 1 - \frac{\left[\sum(Y_{obs(test)} - Y_{pred(test)})^2\right]/N_{test}}{\left[\sum(Y_{obs(test)} - \overline{Y_{train}})^2\right]/N_{train}}$                                                                 | [61]      |
| 15        | $CCC = \frac{2 \sum(Y_{obs} - \overline{Y_{obs}})(Y_{pred} - \overline{Y_{pred}})}{\sum(Y_{obs} - \overline{Y_{obs}})^2 + \sum(Y_{pred} - \overline{Y_{pred}})^2 + N_{test}(\overline{Y_{obs}} - \overline{Y_{pred}})^2}$ | [62,67]   |
| 16        | $MAE = \frac{\sum Y_{obs(test)} - Y_{pred(test)} }{N_{test}}$                                                                                                                                                             | [58]      |
| 17        | $Scaled Y_i = \frac{Y_i - Y_{min}}{Y_{max} - Y_{min}}$                                                                                                                                                                    | [57]      |

\* Scaled  $Y_i$  must be used (Equation (17)).

**Table S7.** Definition of consensus scoring functions [37].

| Scoring Function                                                 | Parameters <sup>a</sup>      |                                                                   |                                                                  |
|------------------------------------------------------------------|------------------------------|-------------------------------------------------------------------|------------------------------------------------------------------|
|                                                                  | P1                           | P2                                                                | P3 <sup>b</sup>                                                  |
| $F1 = \sum_{i=1}^7 P1_i + \sum_{i=1}^3 P2_i + \sum_{i=1}^2 P3_i$ | (1) $R^2 > 0.8$              |                                                                   |                                                                  |
|                                                                  | (2) $Q^2 > 0.5$              |                                                                   |                                                                  |
|                                                                  | (3) $R_{pred}^2 > 0.6$       | (1) $\frac{R^2 - R_0^2}{R^2}$ or $\frac{R^2 - R_0'^2}{R^2} < 0.1$ | (1) $MAE \leq 0.34$ and $MAE + 3\sigma_{MAE} \leq 0.68$          |
|                                                                  | (4) $Q_{F2}^2 > 0.5$         | (2) $ R_0^2 - R_0'^2  < 0.3$                                      | (2) $MAE \leq 0.51$ and $MAE + 3\sigma_{MAE} \leq 0.85$          |
|                                                                  | (5) $Q_{F3}^2 > 0.5$         | (3) $\Delta R_m^2 < 0.2$                                          |                                                                  |
|                                                                  | (6) $CCC > 0.85$             |                                                                   |                                                                  |
|                                                                  | (7) $\overline{R_m^2} > 0.5$ |                                                                   |                                                                  |
| $F2 = \sum_{i=1}^8 P1_i + \sum_{i=1}^3 P2_i + \sum_{i=1}^2 P3_i$ | (1) $R^2 - 0.8$              |                                                                   | (1) If $MAE - 0.51 > 0$ or<br>$MAE + 3\sigma_{MAE} - 0.85 > 0$ : |
|                                                                  | (2) $Q^2 - 0.5$              |                                                                   | $MAE - 0.51$                                                     |
|                                                                  | (3) $R_{pred}^2 - 0.6$       | (1) if $\frac{R^2 - R_0^2}{R^2} < \frac{R^2 - R_0'^2}{R^2}$ ;     | if $MAE - 0.51 > MAE + 3\sigma_{MAE} - 0.85$                     |
|                                                                  | (4) $Q_{F2}^2 - 0.5$         | $0.1 - \frac{R^2 - R_0^2}{R^2}$                                   | and                                                              |
|                                                                  | (5) $Q_{F3}^2 - 0.5$         |                                                                   | $3\sigma_{MAE} - 0.85$                                           |
|                                                                  | (6) $CCC - 0.85$             | otherwise: $0.1 - \frac{R^2 - R_0'^2}{R^2}$                       | if $MAE - 0.51 < MAE + 3\sigma_{MAE} - 0.85$                     |
|                                                                  | (7) $\overline{R_m^2} - 0.5$ |                                                                   | (2) If $MAE - 0.34 > 0$ and<br>$MAE + 3\sigma_{MAE} - 0.68 > 0$  |
|                                                                  | (8) $R^2 - Q_{F2}^2$         | (2) $0.3 -  R_0^2 - R_0'^2 $                                      | Or if $MAE - 0.34 < 0$ and<br>$MAE + 3\sigma_{MAE} - 0.68 < 0$ : |
|                                                                  | if $R^2 > Q_{F2}^2$          | (3) $0.2 - \Delta R_m^2$                                          | $(0.34 - MAE) + (0.68 - [MAE + 3\sigma_{MAE}])$                  |
|                                                                  | or $-Q_{F2}^2$               |                                                                   |                                                                  |
|                                                                  | if $R^2 < Q_{F2}^2$          |                                                                   |                                                                  |

<sup>a</sup> All the definitions of the involved parameters are found in the previous table (Table S4). <sup>b</sup> Thresholds used as originally reported (see [37] for details).

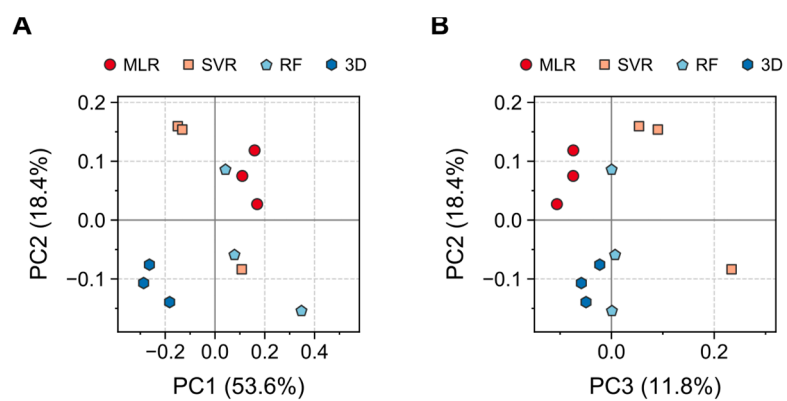

**Figure S1.** Comparison of models' performance using different metrics and PCA. (A) PC1-PC2 and (B) PC3-PC2 score plots from PCA on validation metrics.



**Table S8.** Activity predictions by model 3D4.

| ID | pIC <sub>50</sub> |       | Set      | ID | pIC <sub>50</sub> |       | Set      |
|----|-------------------|-------|----------|----|-------------------|-------|----------|
|    | Exp.*             | Pred. |          |    | Exp.*             | Pred. |          |
| 1  | 5.11              | 5.06  | training | 36 | 4.66              | 4.46  | training |
| 2  | 5.13              | 5.31  | test     | 37 | 4.52              | 4.47  | training |
| 3  | 5.38              | 5.35  | test     | 38 | 4.76              | 4.78  | training |
| 4  | 4.97              | 5.26  | test     | 39 | 4.73              | 4.39  | test     |
| 5  | 5.22              | 5.44  | test     | 40 | 4.86              | 4.73  | training |
| 6  | 4.97              | 5.09  | training | 41 | 4.61              | 4.85  | training |
| 7  | 5.04              | 5.46  | test     | 42 | 4.52              | 4.51  | test     |
| 8  | 5.40              | 5.53  | test     | 43 | 4.50              | 4.60  | training |
| 9  | 5.51              | 5.41  | test     | 44 | 4.47              | 4.19  | training |
| 10 | 5.68              | 5.84  | training | 45 | 4.79              | 4.77  | test     |
| 11 | 4.90              | 5.57  | training | 46 | 4.82              | 5.16  | training |
| 12 | 5.41              | 5.34  | training | 47 | 4.97              | 4.80  | training |
| 13 | 6.27              | 5.49  | training | 48 | 4.53              | 4.80  | training |
| 14 | 5.78              | 5.40  | training | 49 | 4.94              | 5.06  | training |
| 15 | 5.78              | 5.73  | test     | 50 | 4.87              | 4.65  | training |
| 16 | 4.63              | 5.28  | training | 51 | 4.66              | 4.61  | test     |
| 17 | 5.20              | 5.44  | test     | 52 | 4.76              | 4.96  | test     |
| 18 | 5.71              | 5.42  | training | 53 | 4.92              | 4.72  | test     |
| 19 | 5.19              | 4.74  | training | 54 | 4.99              | 4.45  | training |
| 20 | 3.80              | 4.42  | training | 55 | 4.36              | 4.20  | test     |
| 21 | 5.05              | 4.50  | training | 56 | 4.87              | 4.46  | test     |
| 22 | 4.27              | 4.55  | training | 57 | 5.40              | 4.89  | training |
| 23 | 4.08              | 4.45  | training | 58 | 4.97              | 4.88  | training |
| 24 | 3.67              | 3.87  | training | 59 | 4.77              | 5.23  | training |
| 25 | 5.42              | 5.37  | training | 60 | 4.75              | 4.63  | training |
| 26 | 5.35              | 5.43  | training | 61 | 4.49              | 4.58  | test     |
| 27 | 5.47              | 5.71  | training | 62 | 5.25              | 4.87  | training |
| 28 | 5.16              | 5.18  | training | 63 | 5.69              | 5.22  | training |
| 29 | 4.23              | 4.37  | training | 64 | 4.88              | 5.47  | training |
| 30 | 3.73              | 4.17  | test     | 65 | 4.89              | 5.37  | training |
| 31 | 4.00              | 4.12  | test     | 66 | 5.20              | 5.19  | training |
| 32 | 3.87              | 4.05  | training | 67 | 4.78              | 4.59  | training |
| 33 | 3.80              | 4.11  | training | 68 | 4.42              | 4.27  | training |
| 34 | 4.15              | 3.92  | test     | 69 | 4.73              | 4.67  | training |
| 35 | 4.23              | 4.14  | training | 70 | 4.79              | 4.72  | training |

\* Taken from [26].

**Table S9.** Molecular descriptors considered for model building.

| <b>Molecular Descriptor</b> | <b>Description</b>                                                                                              |
|-----------------------------|-----------------------------------------------------------------------------------------------------------------|
| AM1_E                       | The total SCF energy (kcal/mol)                                                                                 |
| AM1_Eele                    | The electronic energy (kcal/mol)                                                                                |
| AM1_HF                      | The heat of formation (kcal/mol)                                                                                |
| AM1_HOMO                    | HOMO energy (eV)                                                                                                |
| apol                        | Sum of the atomic polarizabilities                                                                              |
| ASA                         | Water accessible surface area                                                                                   |
| ASA_H                       | Water accessible surface area of all hydrophobic atoms                                                          |
| ast_violation               | Astex fragment-like violation count                                                                             |
| ast_violation_ext           | Astex fragment-like violation count (extended)                                                                  |
| a_count                     | Number of atoms (including implicit hydrogens)                                                                  |
| a_heavy                     | Number of heavy atoms                                                                                           |
| a_hyd                       | Number of hydrophobic atoms                                                                                     |
| a_IC                        | Atom information content (total)                                                                                |
| a_nC                        | Number of carbon atoms                                                                                          |
| a_nO                        | Number of oxygen atoms                                                                                          |
| BCUT_SLOGP_1                | 2nd BCUT descriptor using atomic contribution to LogP                                                           |
| bpol                        | Sum of the absolute value of the difference between atomic polarizabilities of all bonded atoms in the molecule |
| b_count                     | Number of bonds (including implicit hydrogens)                                                                  |
| b_double                    | Number of double bonds. Aromatic bonds are not considered to be double bonds.                                   |
| b_heavy                     | Number of bonds between heavy atoms                                                                             |
| b_single                    | Number of single bonds                                                                                          |
| chi0                        | Atomic connectivity index (order 0)                                                                             |
| chi0v                       | Atomic valence connectivity index (order 0)                                                                     |
| chi0v_C                     | Carbon valence connectivity index (order 0)                                                                     |
| chi0_C                      | Carbon connectivity index (order 0)                                                                             |
| chi1                        | Atomic connectivity index (order 1)                                                                             |
| chi1v                       | Atomic valence connectivity index (order 1)                                                                     |
| chi1v_C                     | Carbon valence connectivity index (order 1)                                                                     |
| chi1_C                      | Carbon connectivity index (order 1)                                                                             |
| E_vdw                       | van der Waals component of the potential energy                                                                 |
| GCUT_PEOE_0                 | Smallest GCUT descriptor using PEOE partial charges                                                             |
| GCUT_PEOE_3                 | Largest GCUT descriptor using PEOE partial charges                                                              |
| GCUT_SLOGP_3                | Largest GCUT descriptor using atomic contribution to LogP                                                       |
| GCUT_SMR_3                  | Largest GCUT descriptor using atomic contribution to molar refractivity                                         |
| h_ema                       | Sum of hydrogen bond acceptor strengths                                                                         |
| h_logD                      | The octanol/water distribution coefficient at pH 7                                                              |
| h_logP                      | Log of the octanol/water partition coefficient using an 8-parameter model based on Hückel Theory                |
| h_logS                      | Log of the aqueous solubility (mol/L) using a 7-parameter model based on Hückel Theory                          |
| h_log_pbo                   | Sum of log (1 + pi bond order) for all bonds                                                                    |

| <b>Molecular Descriptor</b> | <b>Description</b>                                                                              |
|-----------------------------|-------------------------------------------------------------------------------------------------|
| h_mr                        | Molar refractivity using a 4-parameter model based on Hückel Theory                             |
| Kier1                       | 1st kappa shape index                                                                           |
| Kier3                       | 3rd kappa shape index                                                                           |
| KierA1                      | 1st alpha modified shape index                                                                  |
| KierA2                      | 2nd alpha modified shape index                                                                  |
| KierA3                      | 3rd alpha modified shape index                                                                  |
| KierFlex                    | Kier molecular flexibility index                                                                |
| logP(o/w)                   | Log octanol/water partition coefficient                                                         |
| logS                        | Log of the aqueous solubility (mol/L)                                                           |
| MNDO_E                      | The total SCF energy (kcal/mol)                                                                 |
| MNDO_Eele                   | The electronic energy (kcal/mol)                                                                |
| mr                          | Molecular refractivity                                                                          |
| PEOE_RPC-                   | Relative negative partial charge using PEOE method                                              |
| PEOE_VSA+5                  | Sum of van der Waals surface area where partial charge is in the range [0.25, 0.30)             |
| PEOE_VSA-0                  | Sum of van der Waals surface area where partial charge is in the range [-0.05, 0.00)            |
| PEOE_VSA-5                  | Sum of van der Waals surface area where partial charge is in the range [-0.30, -0.25)           |
| PEOE_VSA_HYD                | Total hydrophobic van der Waals surface area                                                    |
| PEOE_VSA_NEG                | Total negative van der Waals surface area                                                       |
| PEOE_VSA_PNEG               | Total negative polar van der Waals surface area                                                 |
| PEOE_VSA_POL                | Total polar van der Waals surface area                                                          |
| PM3_E                       | The total SCF energy (kcal/mol)                                                                 |
| PM3_Eele                    | The electronic energy (kcal/mol)                                                                |
| PM3_HF                      | The heat of formation (kcal/mol)                                                                |
| PM3_LUMO                    | LUMO energy (eV)                                                                                |
| pmi                         | Principal moment of inertia                                                                     |
| pmi1                        | 1st diagonal element of diagonalized moment of inertia tensor                                   |
| pmi2                        | 2nd diagonal element of diagonalized moment of inertia tensor                                   |
| pmi3                        | 3rd diagonal element of diagonalized moment of inertia tensor                                   |
| pmiX                        | x component of the principal moment of inertia                                                  |
| pmiZ                        | z component of the principal moment of inertia                                                  |
| Q_VSA_HYD                   | Total hydrophobic van der Waals surface area                                                    |
| Q_VSA_POS                   | Total positive van der Waals surface area                                                       |
| radius                      | Smallest entry in the distance matrix                                                           |
| rgyr                        | Radius of gyration                                                                              |
| SlogP                       | Log of the octanol/water partition coefficient                                                  |
| SlogP_VSA2                  | Sum of van der Waals surface area where the contribution to SlogP is in the range (-0.20, 0.00] |
| SlogP_VSA9                  | Sum of van der Waals surface area where the contribution to SlogP is > 0.40                     |
| SMR                         | Molecular refractivity                                                                          |
| SMR_VSA0                    | Sum of van der Waals surface area where the contribution to SMR is in the range (0.00, 0.11]    |
| SMR_VSA7                    | Sum of van der Waals surface area where the contribution to SMR is > 0.56                       |

| Molecular Descriptor | Description                                                                                                                                                                                   |
|----------------------|-----------------------------------------------------------------------------------------------------------------------------------------------------------------------------------------------|
| std_dim1             | Standard dimension 1                                                                                                                                                                          |
| std_dim2             | Standard dimension 2                                                                                                                                                                          |
| VAdjEq               | Vertex adjacency information (equality)                                                                                                                                                       |
| VAdjMa               | Vertex adjacency information (magnitude)                                                                                                                                                      |
| VDistEq              | If $m$ is the sum of the distance matrix entries then VdistEq is defined to be the sum of $\log_2 m - \pi \log_2 \pi / m$ where $\pi$ is the number of distance matrix entries equal to $i$ . |
| VDistMa              | If $m$ is the sum of the distance matrix entries then VDistMa is defined to be the sum of $\log_2 m - \sum_{i,j} \log_2 D_{ij} / m$ over all $i$ and $j$                                      |
| vdw_area             | Area of van der Waals surface ( $\text{\AA}^2$ )                                                                                                                                              |
| vdw_vol              | van der Waals volume ( $\text{\AA}^3$ )                                                                                                                                                       |
| vol                  | Van der Waals volume                                                                                                                                                                          |
| VSA                  | Van der Waals surface area                                                                                                                                                                    |
| vsa_acc              | Approximation to the sum of VDW surface areas ( $\text{\AA}^2$ ) of pure hydrogen bond acceptors                                                                                              |
| vsa_hyd              | Approximation to the sum of VDW surface areas of hydrophobic atoms ( $\text{\AA}^2$ )                                                                                                         |
| vsa_other            | Approximation to the sum of VDW surface areas of atoms typed as "other" ( $\text{\AA}^2$ )                                                                                                    |
| vsurf_CW1            | Capacity factor at -0.2                                                                                                                                                                       |
| vsurf_D1             | Hydrophobic volume at -0.2                                                                                                                                                                    |
| vsurf_D2             | Hydrophobic volume at -0.4                                                                                                                                                                    |
| vsurf_D3             | Hydrophobic volume at -0.6                                                                                                                                                                    |
| vsurf_D4             | Hydrophobic volume at -0.8                                                                                                                                                                    |
| vsurf_D5             | Hydrophobic volume at -1.0                                                                                                                                                                    |
| vsurf_G              | Surface globularity                                                                                                                                                                           |
| vsurf_S              | Interaction field area                                                                                                                                                                        |
| vsurf_V              | Interaction field volume                                                                                                                                                                      |
| vsurf_W1             | Hydrophilic volume at -0.2                                                                                                                                                                    |
| vsurf_Wp1            | Polar volume at -0.2                                                                                                                                                                          |
| Weight               | Molecular weight (CRC)                                                                                                                                                                        |
| wienerPath           | Wiener path number                                                                                                                                                                            |
| wienerPol            | Wiener polarity number                                                                                                                                                                        |
| zagreb               | Zagreb index                                                                                                                                                                                  |
